# Supplementary material for: Photoisomerization of matrix isolated F2CS into cis and trans FCSF
Source: Royal Society of Chemistry journal article supplement (doi:10.1039/b911638a), 2009-01-01
Supplement: b911638a.pdf [file b911638a.pdf]

## Electronic Supplementary Information for

### Photoisomerization of matrix isolated F<sub>2</sub>CS into *cis* and *trans* FCSF

Xiaoqing Zeng,<sup>a</sup> Helmut Beckers<sup>a</sup> and Helge Willner<sup>\*a</sup>

<sup>a</sup>Bergische Universität Wuppertal,  
FB C – Mathematik und Naturwissenschaften – Fachgruppe Chemie, Gaußstr. 20,  
42097 Wuppertal, Germany  
*willner@uni-wuppertal.de*

#### Sample preparations:

A few mg of F<sub>2</sub>CS used in this study were taken out of sealed glass ampoules which were stored at liquid nitrogen temperature in a long term Dewar vessel. The sample of F<sub>2</sub>CS was used before for vibrational studies.<sup>1</sup> The ampoules were opened at a vacuum line by using a special device.<sup>2</sup> A 30% <sup>34</sup>S-enriched F<sub>2</sub>CS sample was prepared in a flame-sealed glass tube (o.d. 6 mm, vol. 3 ml) by pyrolyzing small pieces of Teflon (10 mg) with a torch and then by reacting the gaseous products with 30% <sup>34</sup>S-enriched sulfur (5 mg) at 400 °C for a few minutes. About 0.07 mmol of <sup>34</sup>S-enriched F<sub>2</sub>CS was obtained by repeated fractional condensation in vacuum. The purity of all samples was checked by FT-IR in the gas phase.

#### Spectroscopic investigations:

Infrared spectra of the matrix-isolated species were recorded on a FTIR spectrometer (IFS 66v/S Bruker) in reflectance mode using a transfer optic. A KBr beam splitter and a MCT detector was used in the region of 5000 – 530 cm<sup>-1</sup> and a Ge-coated 6-μ mylar beam splitter with He(I) cooled Si bolometer in the region of 700 – 150 cm<sup>-1</sup>. For each spectrum 64 scans at resolution of 0.25 cm<sup>-1</sup> were coadded.

Preparation of the matrices: The stable gaseous precursor F<sub>2</sub>CS was mixed with argon (1:500) in a 1-L stainless-steel storage container and then small amounts (2 mmol) of the mixtures were deposited within 20 minutes onto the cold matrix support (16 K, Rh plated Cu block) in high vacuum. Photolysis experiments were carried out with ArF excimer laser (Lambda-Physik, 2mJ, 1 hour). Details of the matrix apparatus have been described elsewhere.<sup>3</sup>

Theoretical Calculations: Quantum chemical calculations were carried out using the Gaussian03 software package, and the 6-311+G(3df) basis set was used for all calculations.<sup>4</sup> The geometries of all stationary points were fully optimized with MP2,<sup>5</sup> MPW1PW96,<sup>6</sup> B3LYP,<sup>7</sup> BP86,<sup>8</sup> and CBS-QB3<sup>9</sup> methods. Local minima were confirmed by vibrational frequency analysis, and transition states were further confirmed by intrinsic reaction coordinate (IRC) calculations.<sup>10</sup> Spin-unrestricted methods were utilized for the calculations of the triplet species. Natural bond order (NBO) analysis was performed using NBO 3.1 implemented in Gaussian 03 with the B3LYP method.<sup>11</sup>

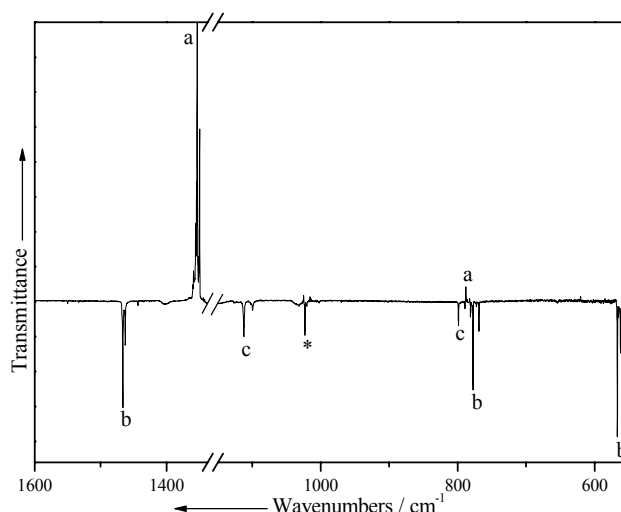

**Figure S1.** Difference IR spectrum (in transmittance) by subtracting the IR spectrum of Ar matrix isolated 30%  $^{34}\text{S}$ -enriched  $\text{F}_2\text{CS}$  recorded before and after ArF excimer laser irradiation ( $\lambda = 193$  nm). Bands associated with  $\text{F}_2\text{CS}$ , *cis* FCSF, and *trans* FCSF are denoted by a, b, and c, respectively. The band marked with \* is due to the incompensation of a strong  $\text{SiF}_4$  band.

Computational results:

**Table S1.** Calculated total energies (a.u.) and relative energies ( $\text{kJ mol}^{-1}$ ) of  $\text{F}_2\text{CS}$  isomers and transition states for the 1,2-fluorine shift (TS1), the *trans-cis* isomerization transition states of the carbon-inversion (TS2) and the rotation around the C-S bond (TS2') using the 6-311+G(3df) basis set.

|                                   | $\text{F}_2\text{CS}$ | FCSF ( $^3\text{A}$ ) | TS1         | <i>trans</i> FCSF | TS2         | TS2'        | <i>cis</i> FCSF |
|-----------------------------------|-----------------------|-----------------------|-------------|-------------------|-------------|-------------|-----------------|
| B3LYP                             | -636.064267           | -635.933109           | -635.888187 | -635.967478       | -635.958190 | -635.919361 | -635.986688     |
| BP86                              | -636.095079           |                       |             | -636.000250       |             |             | -636.025592     |
| MPW1PW91                          | -636.005693           |                       |             | -635.904176       |             |             | -635.923152     |
| MP2                               | -635.152541           | -634.998399           | -634.952525 | -635.039634       | -635.030854 | -634.990493 | -635.065745     |
| CBS-QB3                           | -635.288695           |                       |             | -635.187335       |             |             | -635.206680     |
| $E_{\text{Rel}}(\text{B3LYP})$    | 0.0                   | 344.5                 | 462.5       | 254.2             | 278.6       | 380.6       | 203.8           |
| $E_{\text{Rel}}(\text{BP86})$     | 0.0                   |                       |             | 249.1             |             |             | 182.5           |
| $E_{\text{Rel}}(\text{MPW1PW91})$ | 0.0                   |                       |             | 266.6             |             |             | 216.8           |
| $E_{\text{Rel}}(\text{MP2})$      | 0.0                   | 404.9                 | 525.4       | 296.6             | 319.6       | 425.6       | 228.0           |
| $E_{\text{Rel}}(\text{CBS-QB3})$  | 0.0                   |                       |             | 266.2             |             |             | 215.4           |

**Table S2.** Calculated vibrational frequencies ( $\text{cm}^{-1}$ ) and intensities ( $\text{km mol}^{-1}$ ) in parenthesis for  $\text{F}_2\text{CS}$  with different methods using the 6-311+G(3df) basis set.

| B3LYP        | BP86         | MPW1PW96     | MP2          | CBS-QB3      |
|--------------|--------------|--------------|--------------|--------------|
| 1356.8 (642) | 1312.4 (579) | 1399.3 (659) | 1408.3 (608) | 1356.5 (658) |
| 1185.6 (247) | 1121.4 (240) | 1238.2 (250) | 1213.0 (247) | 1203.5 (269) |
| 799.2 (7)    | 769.1 (9)    | 821.3 (6)    | 807.7 (14)   | 793.7 (7)    |
| 633.7 (1)    | 607.2 (1)    | 649.6 (1)    | 644.6 (1)    | 628.3 (3)    |
| 527.5 (7)    | 508.7 (7)    | 537.5 (7)    | 535.7 (10)   | 524.9 (7)    |

|           |           |           |           |             |
|-----------|-----------|-----------|-----------|-------------|
| 419.9 (0) | 404.7 (0) | 425.9 (0) | 427.0 (0) | 418.4 (< 1) |
|-----------|-----------|-----------|-----------|-------------|

**Table S3.** Calculated vibrational frequencies ( $\text{cm}^{-1}$ ) and intensities ( $\text{km mol}^{-1}$ ) in parenthesis for *cis* FCSF with different methods using the 6-311+G(3df) basis set.

| B3LYP        | BP86         | MPW1PW96     | MP2          | CBS-QB3      |
|--------------|--------------|--------------|--------------|--------------|
| 1502.2 (232) | 1481.2 (224) | 1549.9 (232) | 1689.9 (216) | 1495.3 (228) |
| 801.8 (90)   | 779.1 (106)  | 822.5 (94)   | 857.1 (159)  | 797.6 (95)   |
| 567.2 (216)  | 540.9 (178)  | 600.7 (234)  | 524.1 (2)    | 565.5 (170)  |
| 493.2 (2)    | 483.0 (2)    | 503.1 (2)    | 514.5 (181)  | 487.6 (1)    |
| 475.9 (48)   | 464.8 (40)   | 482.6 (37)   | 453.4 (103)  | 480.4 (27)   |
| 135.1 (22)   | 139.4 (16)   | 141.9 (22)   | 134.3 (24)   | 136.0 (18)   |

**Table S4.** Calculated vibrational frequencies ( $\text{cm}^{-1}$ ) and intensities ( $\text{km mol}^{-1}$ ) in parenthesis for *trans* FCSF with different methods using the 6-311+G(3df) basis set.

| B3LYP        | BP86         | MPW1PW96     | MP2          | CBS-QB3      |
|--------------|--------------|--------------|--------------|--------------|
| 1144.7 (256) | 1126.5 (250) | 1190.9 (260) | 1143.9 (257) | 1126.8 (252) |
| 791.6 (105)  | 744.7 (84)   | 826.6 (107)  | 847.2 (68)   | 733.8 (80)   |
| 721.8 (7)    | 667.0 (16)   | 748.6 (7)    | 789.4 (59)   | 701.3 (9)    |
| 438.6 (< 1)  | 406.2 (< 1)  | 446.0 (< 1)  | 451.6 (< 1)  | 428.9 (1)    |
| 282.3 (< 1)  | 280.2 (< 1)  | 290.0 (< 1)  | 293.0 (< 1)  | 275.8 (< 1)  |
| 236.4 (9)    | 221.7 (11)   | 240.4 (8)    | 235.3 (7)    | 227.0 (8)    |

**Table S5.** Calculated vibrational frequencies ( $\text{cm}^{-1}$ ) and intensities ( $\text{km mol}^{-1}$ ) in parenthesis for triplet FCSF with different methods using the 6-311+G(3df) basis set.

| B3LYP        | MP2          |
|--------------|--------------|
| 1254.5 (288) | 1292.4 (274) |
| 812.4 (10)   | 821.0 (11)   |
| 606.6 (139)  | 721.3 (149)  |
| 430.6 (2)    | 452.5 (7)    |
| 393.7 (< 1)  | 402.5 (< 1)  |
| 151.0 (2)    | 162.9 (2)    |

**Table 6.** Experimental and calculated geometries for  $\text{F}_2\text{CS}$  obtained with different methods at the 6-311+G(3df) basis set. Distances in ( $\text{Å}$ ) and bond angles in ( $^\circ$ ).

| parameters           | Exptl <sup>12</sup> | B3LYP | BP86  | MPW1PW96 | MP2   | CBS-QB3 |
|----------------------|---------------------|-------|-------|----------|-------|---------|
| C-F                  | 1.315 (1)           | 1.313 | 1.327 | 1.303    | 1.311 | 1.316   |
| C-S                  | 1.589 (1)           | 1.594 | 1.603 | 1.589    | 1.590 | 1.598   |
| $\angle(\text{FCF})$ | 107.1 (1)           | 107.2 | 107.2 | 107.4    | 107.1 | 107.4   |

**Table S7.** Calculated geometries for *cis* FCSF obtained with different methods using the 6-311+G(3df) basis set. Distances in (Å) and bond angles in (°).

| parameters | B3LYP | BP86  | MPW1PW96 | MP2    | CBS-QB3 |
|------------|-------|-------|----------|--------|---------|
| C-F        | 1.285 | 1.292 | 1.277    | 1.274  | 1.289   |
| C-S        | 1.549 | 1.560 | 1.542    | 1.518  | 1.553   |
| S-F'       | 1.717 | 1.752 | 1.691    | 1.766  | 1.752   |
| ∠(FCS)     | 140.0 | 142.2 | 140.4    | 151.2  | 140.0   |
| ∠(CSF')    | 124.8 | 128.6 | 124.7    | 131.85 | 126.1   |

**Table S8.** Calculated geometries for *trans* FCSF obtained with different methods using the 6-311+G(3df) basis set. Distances in (Å) and bond angles in (°).

| parameters | B3LYP | BP86  | MPW1PW96 | MP2   | CBS-QB3 |
|------------|-------|-------|----------|-------|---------|
| C-F        | 1.327 | 1.336 | 1.317    | 1.329 | 1.335   |
| C-S        | 1.680 | 1.679 | 1.670    | 1.670 | 1.689   |
| S-F'       | 1.610 | 1.634 | 1.595    | 1.596 | 1.643   |
| ∠(FCS)     | 110.1 | 112.8 | 110.6    | 108.3 | 108.9   |
| ∠(CSF')    | 97.7  | 96.5  | 97.7     | 98.5  | 97.2    |

**Table S9.** Calculated geometries for triplet FCSF obtained at the B3LYP and MP2 levels of theory using the 6-311+G(3df) basis set. Distances in (Å) and bond angles in (°).

| parameters | B3LYP | MP2   |
|------------|-------|-------|
| C-F        | 1.309 | 1.306 |
| C-S        | 1.657 | 1.657 |
| S-F'       | 1.676 | 1.643 |
| ∠(FCS)     | 128.4 | 128.5 |
| ∠(CSF')    | 104.5 | 103.5 |
| ∠(FCSF')   | 90.6  | 88.1  |

**Table S10.** Experimental and calculated IR vibrations for the F<sub>2</sub>CS.

| Assignment            | Calcd <sup>a</sup> | Exptl (in Ar matrix) <sup>b</sup> | Exptl (in gas phase) <sup>b</sup> |
|-----------------------|--------------------|-----------------------------------|-----------------------------------|
| $\nu_1 (a_1)$         | 1356.8 (642)       | 1353.6 vs                         | 1366.712                          |
| $\nu_2 + \nu_5 (b_1)$ |                    | 1212.5 s                          | 1209.1                            |
| $\nu_4 (b_1)$         | 1185.6 (247)       | 1180.0 s                          | 1190.084                          |
| $\nu_2 (a_1)$         | 799.2 (7)          | 787.9 m                           | 789.535                           |
| $\nu_6 (b_2)$         | 633.7 (1)          | 620.5 w                           | 623.187                           |
| $\nu_3 (a_1)$         | 527.5 (7)          | 527.7 m                           | 526.697                           |
| $\nu_5 (b_1)$         | 419.9 (0.1)        | 419.0 wv                          | 419.546                           |

<sup>a</sup> At DFT B3LYP/6-311+G(3df) level of theory with absolute intensities (km mol<sup>-1</sup>) in parenthesis, frequencies in (cm<sup>-1</sup>). <sup>b</sup> Relative intensities are given in vs very strong, s strong, m medium, w weak. <sup>c</sup> See ref[13].

**Table S11.** Natural bond orbital (NBO) analysis results for F<sub>2</sub>CS isomers at the B3LYP/6-311+G(3df) level of theory.

|                   | NBO natural charges         |      |      |       |
|-------------------|-----------------------------|------|------|-------|
|                   | F                           | C    | S    | F'    |
| F <sub>2</sub> CS | -0.31                       | 0.62 | 0.01 |       |
| <i>trans</i> FCSF | -0.33                       | 0.07 | 0.72 | -0.45 |
| <i>cis</i> FCSF   | -0.28                       | 0.07 | 0.76 | -0.54 |
|                   | NBO Wiberg bond index (WBI) |      |      |       |
|                   | F-C                         | C-S  | S-F' |       |
| F <sub>2</sub> CS | 0.92                        | 1.94 |      |       |
| <i>trans</i> FCSF | 0.97                        | 1.66 | 0.76 |       |
| <i>cis</i> FCSF   | 1.01                        | 2.26 | 0.53 |       |

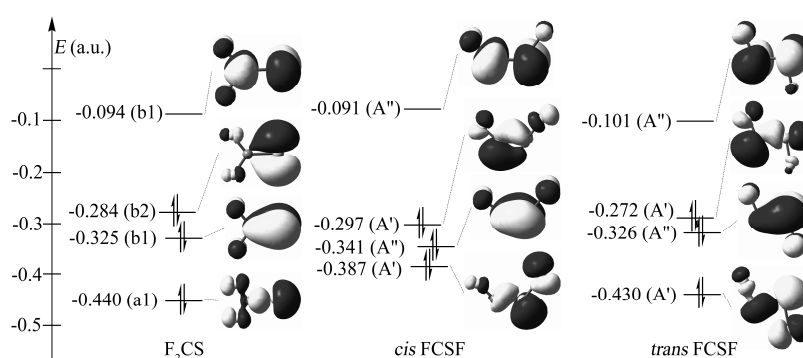

**Figure S2.** Calculated frontier molecular orbitals (isovalue = 0.05) and orbital energies (a.u.) of F<sub>2</sub>CS and *cis/trans* FCSF at the B3LYP/6-311+G(3df) level of theory. Molecular orbitals (MOs) were generated using the program of Gauss View.<sup>14</sup>

Optimized Z-matrix coordinates (angstroms) of all species optimized at the B3LYP/6-311+G(3df) level of theory.

F<sub>2</sub>CS (C<sub>2v</sub>)

| Atoms | X        | Y         | Z         |
|-------|----------|-----------|-----------|
| F     | 0.000000 | 1.057510  | -1.066455 |
| F     | 0.000000 | -1.057510 | -1.066455 |
| C     | 0.000000 | 0.000000  | -0.287141 |
| S     | 0.000000 | 0.000000  | 1.307439  |

*trans* FCSF (C<sub>s</sub>, <sup>1</sup>A')

| Atoms | X         | Y         | Z        |
|-------|-----------|-----------|----------|
| F     | 1.610141  | 0.722336  | 0.000000 |
| F     | -1.482287 | -1.292469 | 0.000000 |
| C     | -0.191782 | -0.981018 | 0.000000 |
| S     | 0.000000  | 0.688582  | 0.000000 |

-----  
*cis* FCSF ( $C_s$ ,  $^1A'$ )

| Atoms | X         | Y         | Z        |
|-------|-----------|-----------|----------|
| F     | 1.707616  | 0.589605  | 0.000000 |
| F     | -1.032422 | -1.688202 | 0.000000 |
| C     | -1.012791 | -0.403153 | 0.000000 |
| S     | 0.000000  | 0.769143  | 0.000000 |

-----  
TS1  $C_1$ , ( $F_2CS \rightarrow trans$  FCSF)

| Atoms |   | X        | Y        | Z        |
|-------|---|----------|----------|----------|
| F     | 0 | 0.000000 | 0.000000 | 0.000000 |
| F     | 0 | 0.000000 | 0.000000 | 2.215782 |
| C     | 0 | 0.447360 | 0.710863 | 1.224117 |
| S     | 0 | 1.969514 | 0.000000 | 0.300966 |

-----  
TS2 ( $C_s$ , *trans* FCSF  $\rightarrow$  *cis* FCSF)

| Atoms | X        | Y        | Z        |
|-------|----------|----------|----------|
| F     | 0.000000 | 0.000000 | 0.000000 |
| F     | 0.000000 | 0.000000 | 3.857969 |
| C     | 0.079087 | 0.000000 | 1.286477 |
| S     | 1.027999 | 0.000000 | 2.480551 |

-----  
TS2' ( $C_1$ , *trans* FCSF  $\rightarrow$  *cis* FCSF)

| Atoms | X        | Y        | Z         |
|-------|----------|----------|-----------|
| F     | 1.233389 | 0.000000 | -0.345988 |
| F     | 0.077174 | 1.646281 | 1.858954  |
| C     | 0.000000 | 0.000000 | 0.000000  |
| S     | 0.000000 | 0.000000 | 1.935200  |

-----  
FCSF ( $C_1$ ,  $^3A$ )

| Atoms | X         | Y         | Z         |
|-------|-----------|-----------|-----------|
| F     | -1.515013 | 0.791073  | 0.018291  |
| F     | 1.928609  | 0.349347  | -0.184898 |
| C     | 0.911419  | -0.131602 | 0.484581  |
| S     | -0.574430 | -0.592136 | -0.088002 |

-----

## References

- <sup>1</sup> Haas, A.; Willner, H.; Bürger, H.; Pawelke, G. *Spectrochim. Acta* **1977**, *33A*, 937.
- <sup>2</sup> Gombler, W.; Willner, H. *J. Phys. E: Sci. Instrum.* **1987**, *20*, 1286.
- <sup>3</sup> Schnöckel, H. G.; Willner, H. in *Infrared and Raman Spectroscopy, Methods and Applications* (Ed.: B. Schrader), VCH, Weinheim, **1994**.
- <sup>4</sup> Frisch, M. J.; Trucks, G. W.; Schelegel, H. B.; Scuseria, G. E.; Robb, M. A.; Cheeseman, J. R.; Montgomery, J. R., Jr.; Vreven, T.; Kudin, K. N.; Burant, J. C.; Millam, J. M.; Iyengar, S. S.; Tomasi, J.; Barone, V.; Mennucci, B.; Cossi, M.; Scalmani, G.; Rega, N.; Petersson, G. A.; Nakatsuji, H.; Hada, M.; Ehara, M.; Toyota, K.; Fukuda, R.; Hasegawa, J.; Ishida, M.; Nakajima, T.; Honda, Y.; Kitao, O.; Nakai, H.; Klene, M.; Li, X.; Knox, J. E.; Hratchian, H. P.; Cross, J. B.; Adamo, C.; Jaramillo, J.; Gomperts, R.; Stratmann, R. E.; Yazyev, O.; Austin, A. J.; Cammi, R.; Pomelli, C.; Ochterski, J. W.; Ayala, P. Y.; Morokuma, K.; Voth, G. A.; Salvador, P.; Dannenberg, J. J.; Zakrzewski, V. G.; Dapprich, S.; Daniels, A. D.; Strain, M. C.; Farkas, O.; Malick, D. K.; Rabuck, A. D.; Raghavachari, K.; Foresman, J. B.; Ortiz, J. V.; Cui, Q.; Baboul, A. G.; Clifford, S.; Cioslowski, J.; Stefanov, B. B.; Liu, G.; Liashenko, A.; Piskorz, P.; Komaromi, I.; Martin, R. L.; Fox, D. J.; Keith, T.; Al-Laham, M. A.; Peng, C. Y.; Nanayakkara, A.; Challacombe, M.; Gill, P. M. W.; Johnson, B.; Chen, W.; Wong, M. W.; Gonzalez, C.; Pople, J. A. *Gaussian03*; Gaussian, Inc.: Pittsburgh, PA, 2003.
- <sup>5</sup> Møller, C.; Plesset, M. S. *Phys. Rev.* **1934**, *46*, 618-622.
- <sup>6</sup> Adamo, C.; Barone, V. *J. Chem. Phys.* **1998**, *108*, 664-675.
- <sup>7</sup> Becke, A. D. *J. Chem. Phys.* **1993**, *98*, 5648.
- <sup>8</sup> Perdew, J. P. *Phys. Rev. B* **1986**, *33*, 8822-8824.
- <sup>9</sup> Montgomery, Jr., J. A.; Frisch, M. J.; Ochterski, J. W.; Petersson, G. A. *J. Chem. Phys.* **2000**, *112*, 6532-6542.
- <sup>10</sup> (a) Gonzalez, C.; Schlegel, H. B. *J. Chem. Phys.* **1989**, *90*, 2154-2161. (b) Gonzalez, C.; Schlegel, H. B. *J. Phys. Chem.* **1990**, *94*, 5523-5527.
- <sup>11</sup> Reed, A. E.; Curtiss, L. A.; Weinhold, F. *Chem. Rev.* **1988**, *88*, 899-926.
- <sup>12</sup> Careless, A. J.; Kroto, H. W.; Landsberg, B. M. *Chem. Phys.* **1973**, *1*, 371-375.
- <sup>13</sup> Flaud, J. -M.; Jerzembeck, W.; Bürger, H. *J. Mol. Spectrosc.* **1999**, *197*, 297-306
- <sup>14</sup> Nielsen, A. B.; Holder, A. J. *GaussView, User's Reference*; GAUSSIAN Inc.: Pittsburgh, PA, 1997-1998.
